# Supplementary material for: The impact of inland ship emissions on air quality
Source: Copernicus journal article supplement (doi:10.5194/egusphere-2022-1411), 2022-12-15
Supplement: Supplementary file 1 [file egusphere-2022-1411-supplement.pdf]

# Supplement

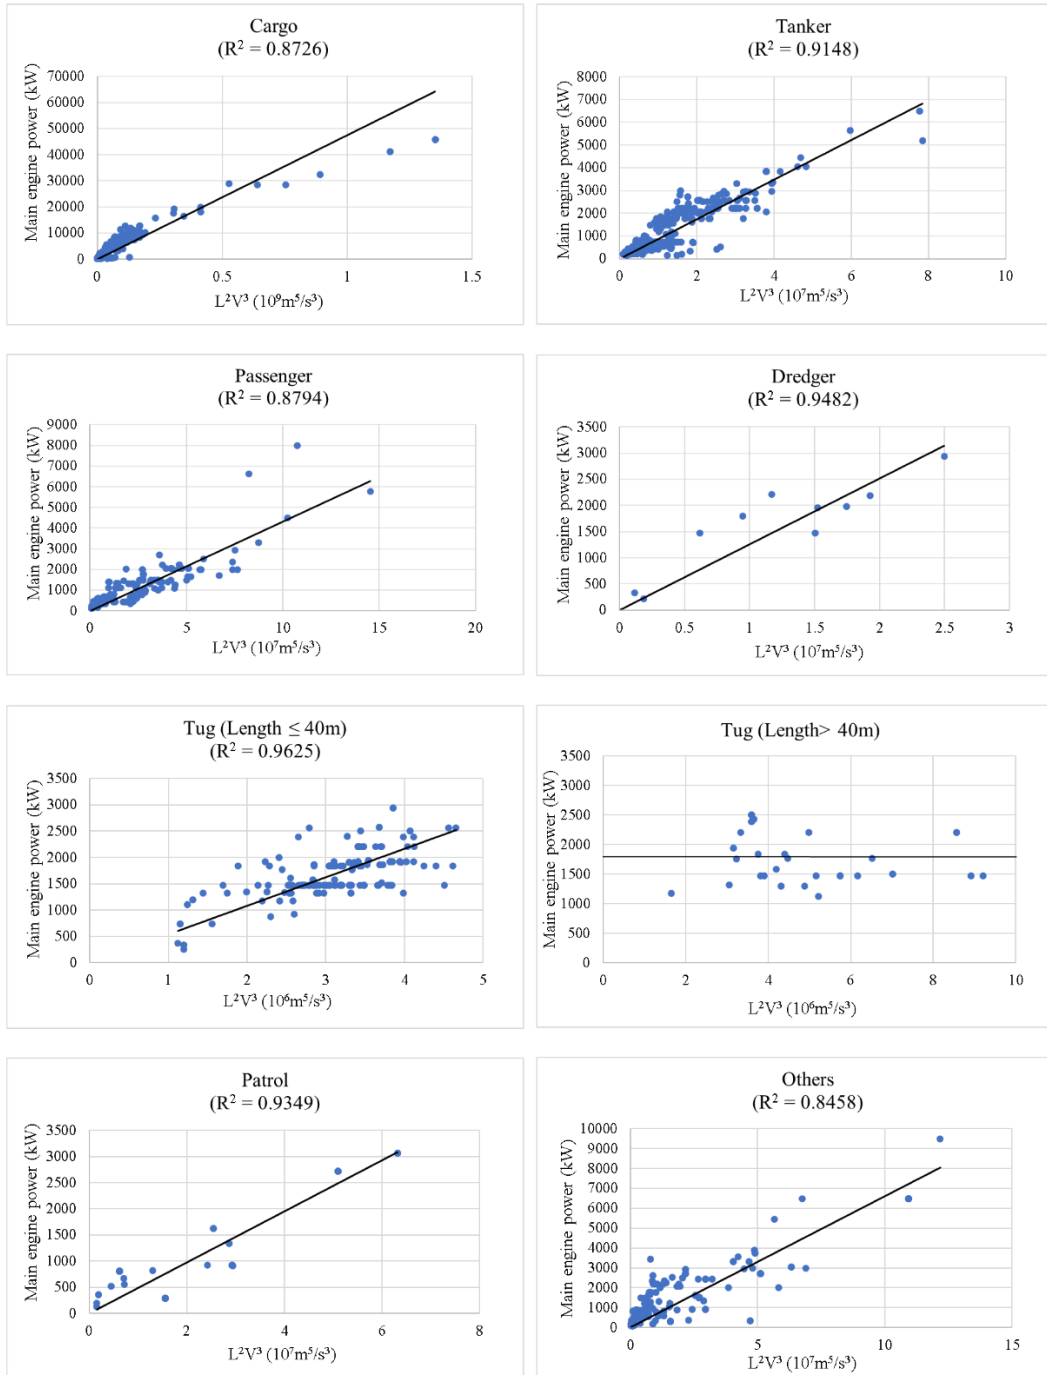

**Figure S1. Fitted linear relationship between main engine power and the square of the vessel's length multiplied by the cube of the real-time speed (y-axis gives the main engine power, x-axis shows  $L^2 \times v_{MAX}^3$ ).**

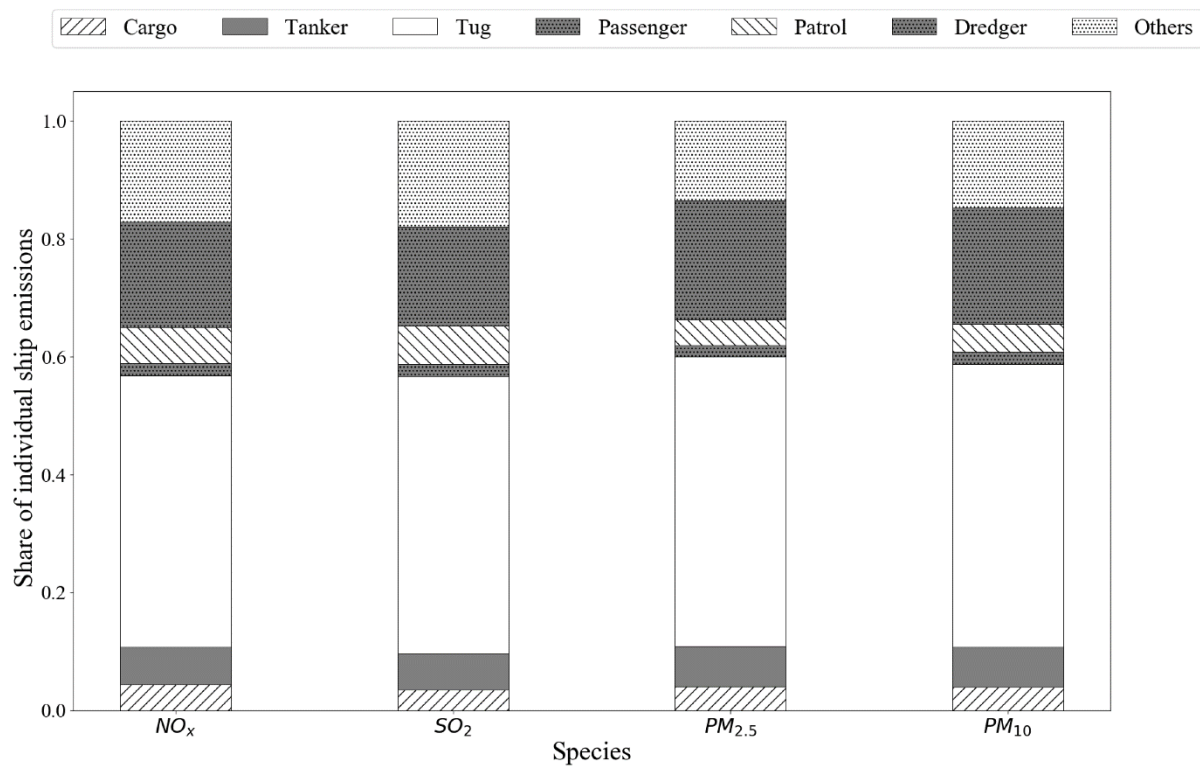

5

**Figure S2. Individual ship emissions of four pollutant species for different types of ships**

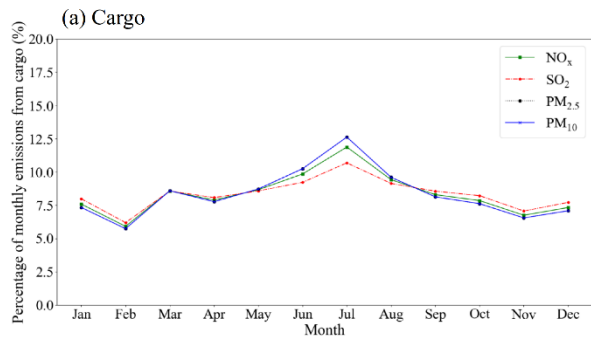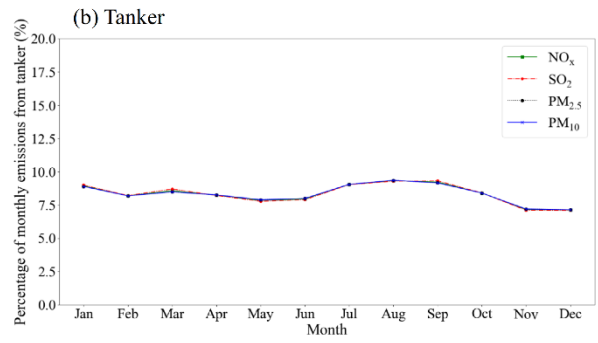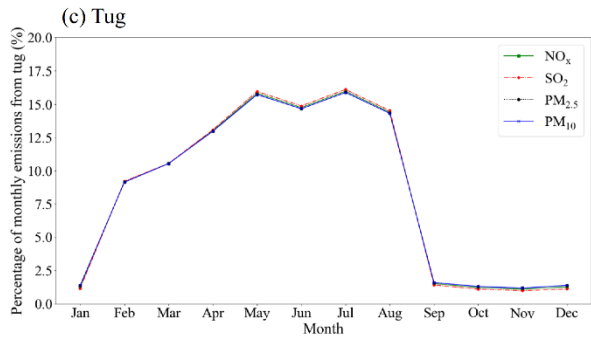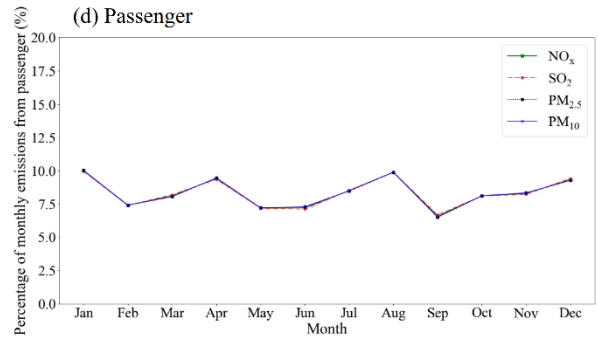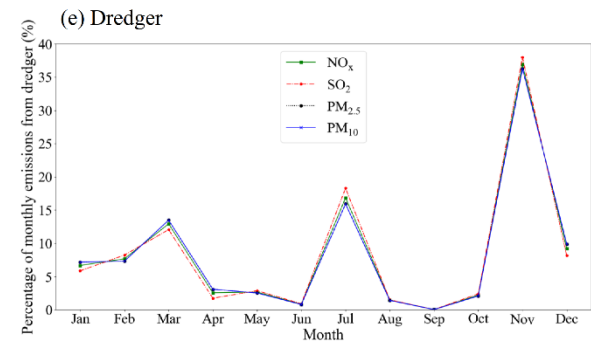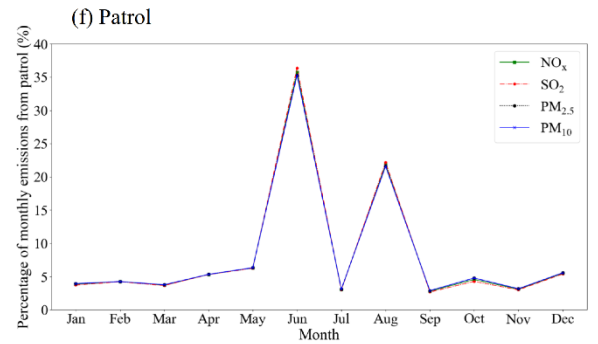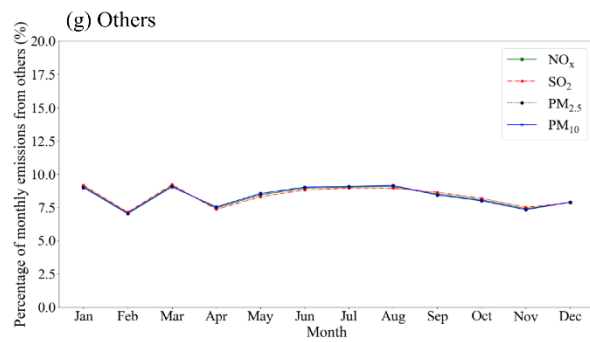

**Figure S3. Monthly changes in the emissions from different types of ships**

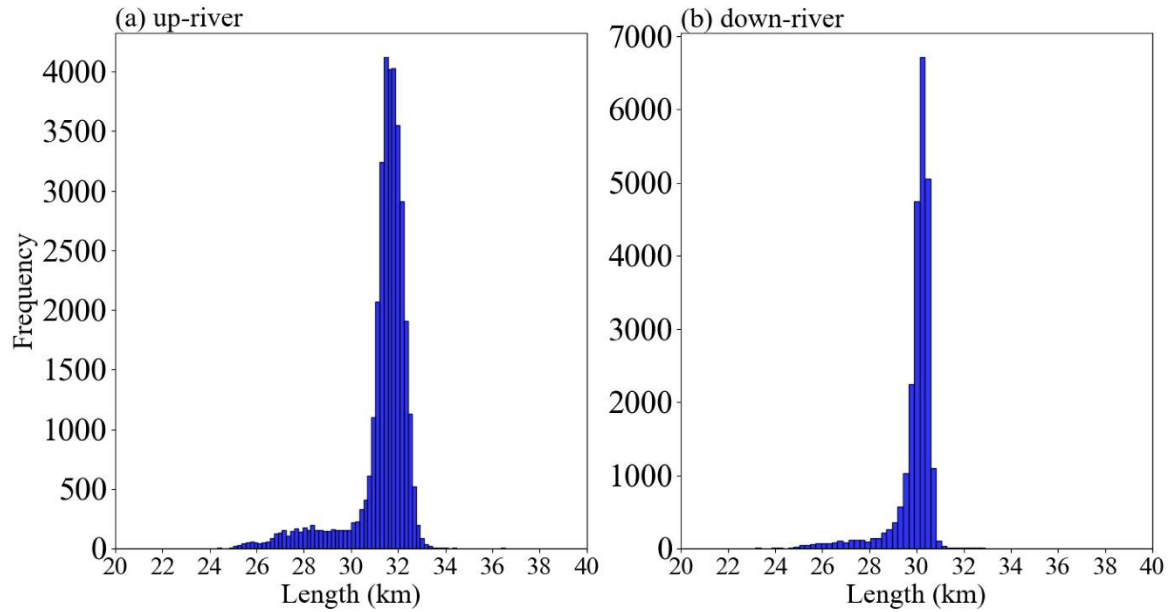

10 **Figure S4. Vessel distance sailing frequency charts derived from AIS for downstream and upstream directions**

**Table S1. Low load adjustment multipliers ( $f_{LLAM}$ ) for main engine emission factors**

| Load | NO <sub>x</sub> | SO <sub>2</sub> | PM <sub>2.5</sub> | PM <sub>10</sub> |
|------|-----------------|-----------------|-------------------|------------------|
| 0.01 | 11.47           | 1               | 19.17             | 19.17            |
| 0.02 | 4.63            | 1               | 7.29              | 7.29             |
| 0.03 | 2.92            | 1               | 4.33              | 4.33             |
| 0.04 | 2.21            | 1               | 3.09              | 3.09             |
| 0.05 | 1.83            | 1               | 2.44              | 2.44             |
| 0.06 | 1.6             | 1               | 2.04              | 2.04             |
| 0.07 | 1.45            | 1               | 1.79              | 1.79             |
| 0.08 | 1.35            | 1               | 1.61              | 1.61             |
| 0.09 | 1.27            | 1               | 1.48              | 1.48             |

|      |      |   |      |      |
|------|------|---|------|------|
| 0.10 | 1.22 | 1 | 1.38 | 1.38 |
| 0.11 | 1.17 | 1 | 1.3  | 1.3  |
| 0.12 | 1.14 | 1 | 1.24 | 1.24 |
| 0.13 | 1.11 | 1 | 1.19 | 1.19 |
| 0.14 | 1.08 | 1 | 1.15 | 1.15 |
| 0.15 | 1.06 | 1 | 1.11 | 1.11 |
| 0.16 | 1.05 | 1 | 1.08 | 1.08 |
| 0.17 | 1.03 | 1 | 1.06 | 1.06 |
| 0.18 | 1.02 | 1 | 1.04 | 1.04 |
| 0.19 | 1.01 | 1 | 1.02 | 1.02 |
| 0.20 | 1    | 1 | 1    | 1    |

**Table S2. Ship traffic volume in each month from September 2018 to August 2019 (Unit: Ships)**

| <b>Types</b> | <b>Jan</b>   | <b>Feb</b>   | <b>Mar</b>   | <b>Apr</b>   | <b>May</b>   | <b>Jun</b>   | <b>Jul</b>   | <b>Aug</b>   | <b>Sep</b>   | <b>Oct</b>   | <b>Nov</b>   | <b>Dec</b>   |
|--------------|--------------|--------------|--------------|--------------|--------------|--------------|--------------|--------------|--------------|--------------|--------------|--------------|
| Cargo        | 48834        | 35154        | 51960        | 50698        | 53759        | 47567        | 48372        | 46242        | 46524        | 47137        | 44777        | 49989        |
| Tanker       | 8577         | 7091         | 8082         | 8299         | 7925         | 7809         | 8419         | 8237         | 7855         | 7995         | 8211         | 8388         |
| Passenger    | 706          | 695          | 718          | 708          | 672          | 635          | 603          | 540          | 744          | 623          | 650          | 677          |
| Tug          | 1007         | 943          | 1137         | 1012         | 1049         | 1075         | 1018         | 984          | 938          | 988          | 946          | 1031         |
| Dredger      | 71           | 5            | 58           | 75           | 23           | 5            | 12           | 5            | 1            | 7            | 39           | 45           |
| Patrol       | 541          | 479          | 478          | 457          | 478          | 423          | 429          | 417          | 450          | 506          | 472          | 522          |
| Other        | 933          | 655          | 1008         | 981          | 1006         | 882          | 909          | 906          | 848          | 897          | 877          | 1030         |
| <b>Total</b> | <b>60669</b> | <b>45022</b> | <b>63441</b> | <b>62230</b> | <b>64912</b> | <b>58396</b> | <b>59762</b> | <b>57331</b> | <b>57360</b> | <b>58153</b> | <b>55972</b> | <b>61682</b> |
